# Supplementary material for: A highly selective ratiometric molecular probe for imaging peroxynitrite during drug-induced acute liver injury
Source: Royal Society of Chemistry journal article supplement (doi:10.1039/d1tb01534f), 2021-01-01
Supplement: d1tb01534f1.pdf [file d1tb01534f1.pdf]

## *Supporting Information*

# **Highly selective ratiometric molecular probe for imaging peroxynitrite during drug-induced acute liver injury**

Xiangyang Gong<sup>a</sup>, Dan Cheng<sup>a, b,\*</sup>, Wei Li<sup>a,\*</sup>, Yang Shen<sup>a</sup>, Rong Peng<sup>a</sup>, Ling Shi<sup>a,\*</sup>, Longwei He<sup>c,\*</sup>, Lin Yuan<sup>a</sup>

<sup>a</sup> *State Key Laboratory of Chemo/Biosensing and Chemometrics, College of Chemistry and Chemical Engineering, Hunan University, Changsha 410082 (PR China)*

<sup>b</sup> *Clinical Research Institute, Affiliated Nanhua Hospital, University of South China, Hengyang 421002, China*

<sup>c</sup> *Department of Pharmacy and Pharmacology, University of South China, Hengyang 421001, China*

## **1. Materials and General Experimental Methods**

Unless otherwise stated, all reagents were purchased from commercial suppliers and used without further purification. Solvents used were purified by standard methods prior to use. Twice-distilled water was used throughout all experiments. Mass spectra were performed using an LCQ advantage ion trap mass spectrometer from Thermo Finnigan. NMR spectra were recorded on a Bruker-400 spectrometer, using TMS as an internal standard. High-resolution electrospray (ESI-HRMS) mass spectra were obtained from The Thermo Fisher Scientific LTQ FT Ultra (Shanghai Institute of Organic Chemistry Chinese Academic of Sciences). Photoluminescent spectra were recorded at room temperature with a HITACHI F4600 fluorescence spectrophotometer (1 cm standard quartz cell). The pH measurements were carried out on a Mettler-Toledo Delta 320 pH meter; the fluorescence images were acquired with a confocal laser scanning microscope (Nikon, Japan); TLC analysis was performed on silica gel plates and column chromatography was

conducted over silica gel (mesh 200-300), both of which were obtained from the Yantai Jiangyou Silica Gel Development Company Limited.

## 2. Synthesis and Characterization

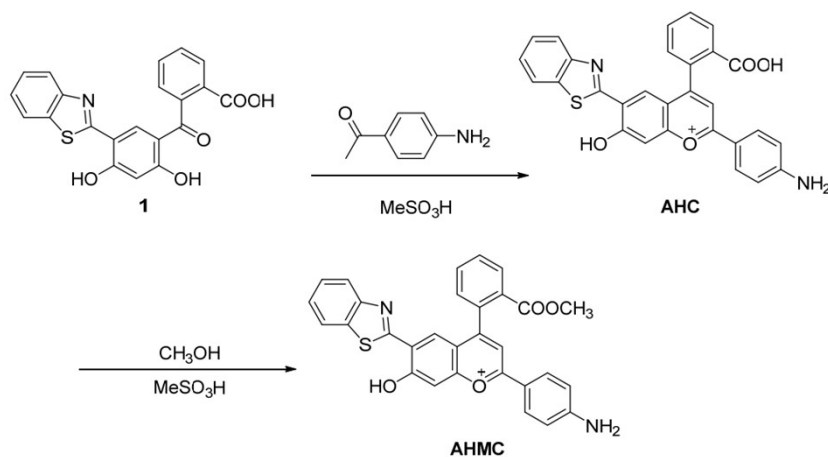

**Scheme S1.** Synthetic routes of probes **AHC** and **AHMC**.

**Synthesis of compound 1.** Compound **1** was prepared by reported method.<sup>1</sup>

## 3. Detection Limit Calculation.

The detection limit was calculated based on the fluorescence titration. The detection limit is calculated using the following equation:

$$\text{Detection limit} = 3\sigma/k \quad (1)$$

where  $\sigma$  is the standard deviation of blank measurements,  $k$  is the slope between the emission ratios versus sample concentration.

## 4. Spectrometric Studies

**Measurement of photophysical properties.** For photophysical characterization, probe **AHC** was dissolved in EtOH to make the stock solutions (500  $\mu\text{M}$ ), which were diluted to 5  $\mu\text{M}$  as the testing solutions with PBS buffer solution (25 mM, 20% EtOH, pH 7.4). Absorption and fluorescence spectroscopic studies were performed on a Shimadzu UV-2700 power spectrometer; a Hitachi F-4600 fluorescence spectrophotometer.

Sources for different ROS/RNS are described as follows. Specifically, H<sub>2</sub>O<sub>2</sub> solution was purchased from Sigma-Aldrich and added into the probe solution directly. Superoxide (O<sub>2</sub><sup>•-</sup>) was generated from KO<sub>2</sub> was dissolved in DMSO. The source of NaOCl was commercial bleach. Hydroxyl radical (<sup>•</sup>OH) was generated by Fenton reaction. Briefly, ferrous chloride (FeCl<sub>2</sub>) was added in the presence of 10 equiv. of H<sub>2</sub>O<sub>2</sub>. The concentration of <sup>•</sup>OH was equal to the Fe(II) concentration. Peroxynitrite (ONOO<sup>-</sup>) solution was synthesized according to literature report.<sup>2</sup> Briefly, a mixture of sodium nitrite (0.6 M) and hydrogen peroxide (0.7 M) was acidified with

hydrochloric acid (0.6 M), and sodium hydroxide (1.5 M) was added within 1-2 seconds to make the solution alkaline. The excess hydrogen peroxide was removed by passing the solution through a short column of manganese dioxide. The concentration of peroxyxynitrite was determined by measuring the absorption of the solution at 302 nm. The extinction coefficient of peroxyxynitrite solution in 0.1 M NaOH is  $1,670 \text{ M}^{-1} \text{ cm}^{-1}$  at 302 nm.<sup>3</sup>

## 5. Fluorescence Microscopic Studies

**Cell culture.** RAW264.7 and L02 cells were cultured in high glucose Dulbecco's Modified Eagle Medium (DMEM, Hyclone) supplemented with 10% fetal bovine serum (FBS, BI), and 1% antibiotics (100 U/mL penicillin and 100  $\mu\text{g}/\text{mL}$  streptomycin, Hyclone) at 37 °C and 5% CO<sub>2</sub>. Cells were carefully harvested and split when they reached 80% confluence to maintain exponential growth.

**Fluorescence microscopic imaging.** All the experiments were conducted in live cells.

For the cell specific experiment, the cell experiment can be divided into five groups. The first group is that RAW264.7 cells were incubated with 10  $\mu\text{M}$  AHMC for 30 min. Then the cells were washed by PBS buffer before imaging. In the second group, RAW264.7 cells were pre-incubated with lipopolysaccharide (LPS, 2  $\mu\text{g}/\text{mL}$ ) and interferon-gamma (IFN- $\gamma$ , 100 ng/mL) for 12 hours, and 10  $\mu\text{M}$  AHMC was further added for 30 min. Then the cells were washed by PBS prior to imaging. In the third group, RAW264.7 cells were incubated with LPS (1  $\mu\text{g}/\text{mL}$ ) and IFN- $\gamma$  (50 ng/mL) in the presence of aminoguanidine (AG, 5 mM) for 12 hours, respectively, and then incubated with 10  $\mu\text{M}$  AHMC for 30 min prior to imaging. In the fourth and fifth group, RAW264.7 cells were incubated with 10  $\mu\text{M}$  AHMC for 30 min, then washed, and incubated with 150  $\mu\text{M}$  H<sub>2</sub>O<sub>2</sub> or 50  $\mu\text{M}$  NaOCl respectively for 30 min prior to imaging. The microscopic imaging uses Nikon confocal microscope with an excitation filter of 405 nm and the collection wavelength range is from blue channel at 425-475 nm and red channel at 560-750 nm, respectively.

**Cell cytotoxicity in MTT assay.** Cells were plated in 96-well flat-bottomed plates at  $1 \times 10^5$  cells per well and allowed to grow overnight prior to exposure to AHMC. Then the MTT (0.5 mg/mL) reagent was added for 4 hours at 37 °C and DMSO (100  $\mu\text{L}/\text{well}$ ) was further incubated with cells to dissolve the precipitated formazan violet crystals at 37 °C for 15 min. The absorbance was measured at 490 nm by a multidetection microplate reader. The following formula was used to calculate the viability of cell growth: Cell viability (%) = (mean of A value of treatment group / mean of A value of control)  $\times$  100.

**Determining the subcellular location of probes.** Live RAW264.7 and L02 cells cultured in 35-mm glass bottom culture dishes were pre-treated with 10  $\mu\text{M}$  AHMC for 30 min. After 30 min treatment at 37 °C, Mito-tracker Green (1.0  $\mu\text{M}$ ) or Lyso-tracker Green (1.0  $\mu\text{M}$ ) were added for another 10 min. Then the cells were washed by PBS prior to imaging.

## 6. Supplemental Figures

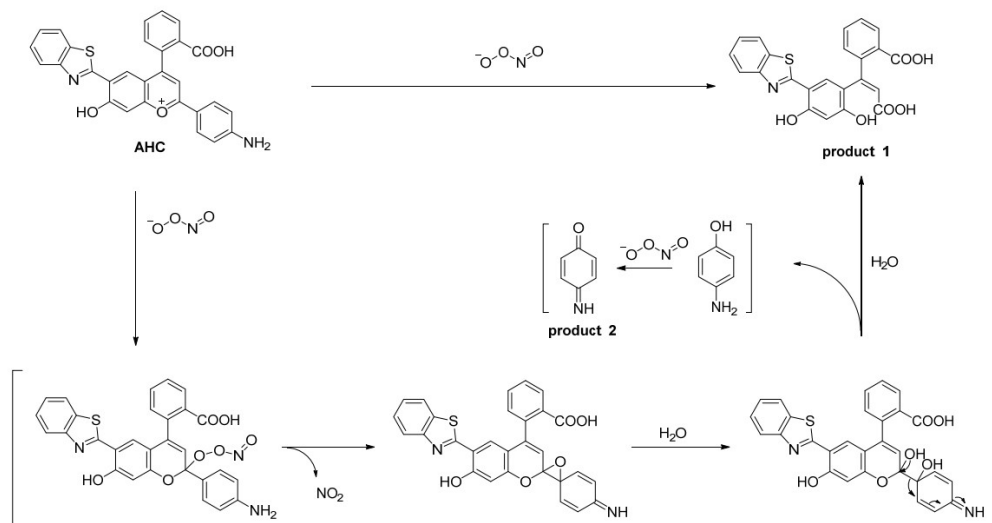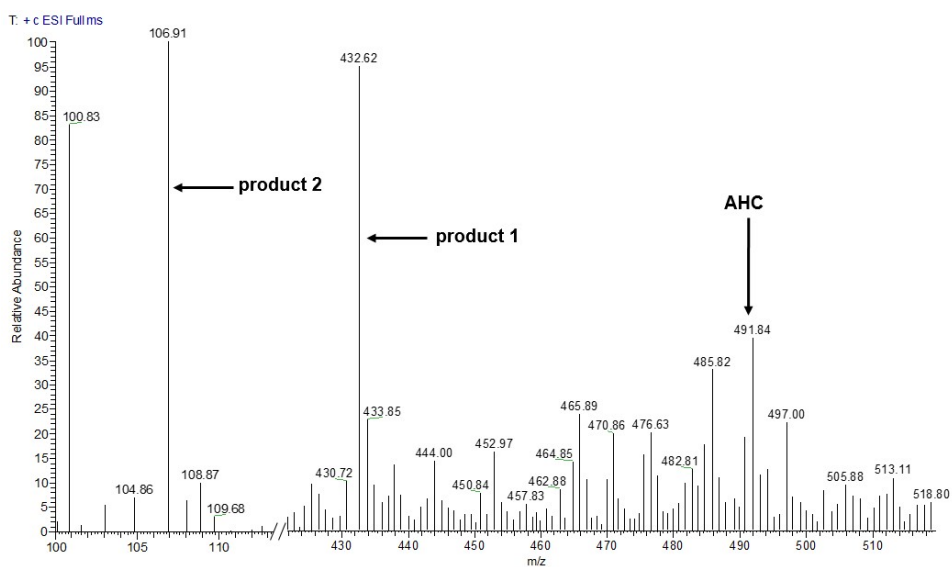

**Figure S1.** The ESI mass spectrum of probe AHC in the presence of ONOO<sup>-</sup>.

**Table S1.** Properties of representative ratiometric fluorescent probes for ONOO<sup>-</sup>

| Probe                         | $\lambda_{\text{ex}}/\lambda_{\text{em}}$ (nm) | Detection limit |
|-------------------------------|------------------------------------------------|-----------------|
| PNCy3Cy5 <sup>4</sup>         | 530/560,660                                    | 0.65 nM         |
| F <sub>482</sub> <sup>5</sup> | 480/510, 606                                   | 150.54 nM       |
| MITO-CC <sup>2</sup>          | 420/473,651                                    | 11.3 nM         |

|                      |             |         |
|----------------------|-------------|---------|
| RTFP <sup>6</sup>    | 405/469,703 | 4.1 nM  |
| ABAH-LW <sup>7</sup> | 370/481,405 | 21.4 nM |
| AHC                  |             |         |
| (this work)          | 380/462,626 | 1.8 nM  |

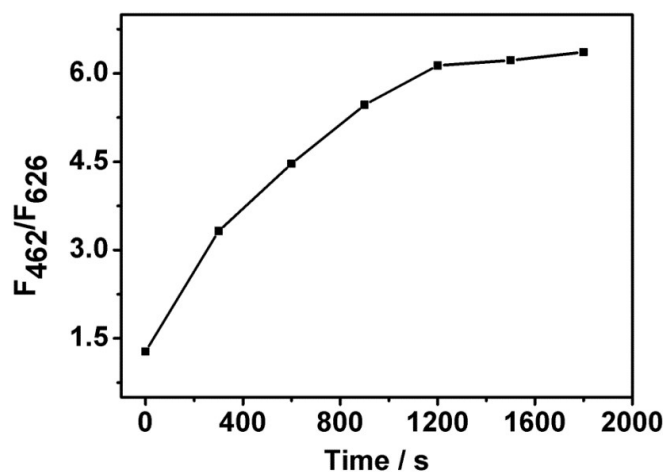

**Figure S2.** Time profile of probe AHC (5  $\mu\text{M}$ ) at  $F_{462}/F_{626}$  with  $\text{ONOO}^-$  (5.4  $\mu\text{M}$ ) in pH 7.4 PBS/EtOH (v/v, 8/2).

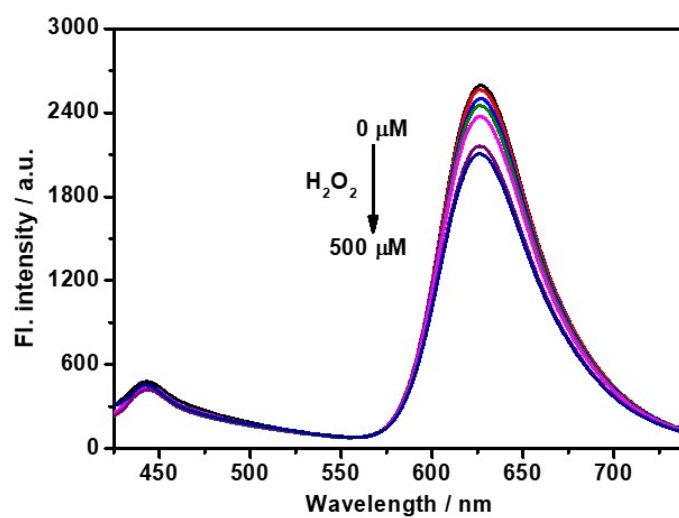

**Figure S3.** Fluorescence spectrum of probe AHC (5  $\mu\text{M}$ ) upon addition of  $\text{H}_2\text{O}_2$  (0-500  $\mu\text{M}$ ) in pH 7.4 PBS/EtOH (v/v, 8/2).  $\lambda_{\text{ex}}$ : 380 nm.

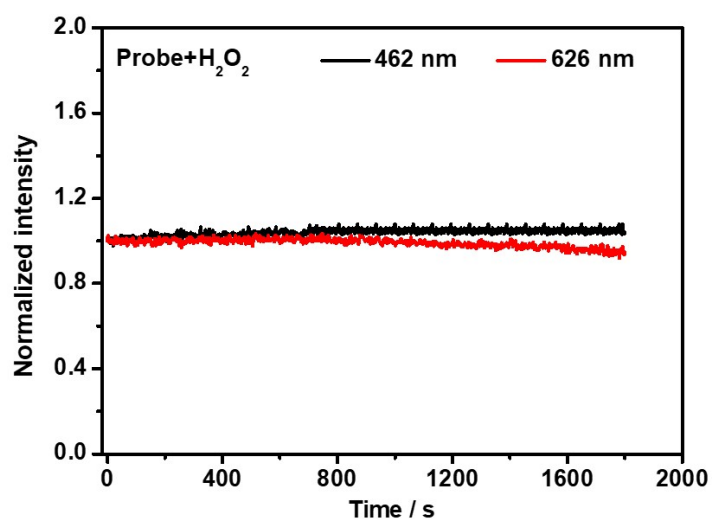

**Figure S4.** Reaction time profile of probe AHC (5  $\mu\text{M}$ ) at 626 nm and 462 nm with  $\text{H}_2\text{O}_2$  (500  $\mu\text{M}$ ) respectively in pH 7.4 PBS/EtOH (v/v, 8/2).

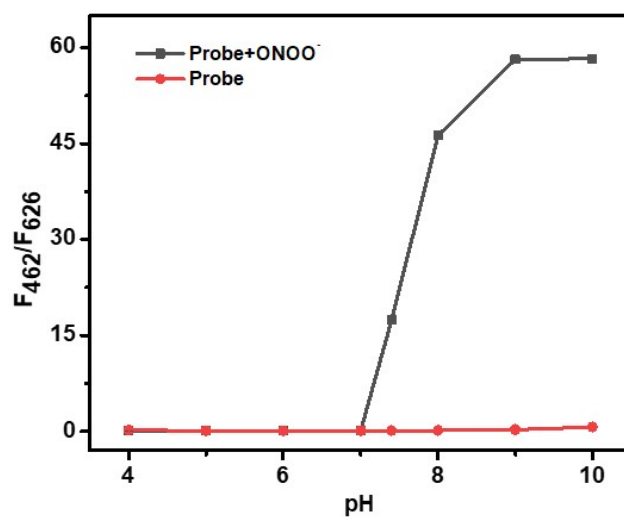

**Figure S5.** pH-dependent fluorescence intensity changes of AHC (5  $\mu\text{M}$ ) toward  $\text{ONOO}^-$  (6  $\mu\text{M}$ ) in PBS buffer solution (25 mM, 20% EtOH, pH = 4.0-10.0),  $\lambda_{\text{ex}}$ : 380 nm.

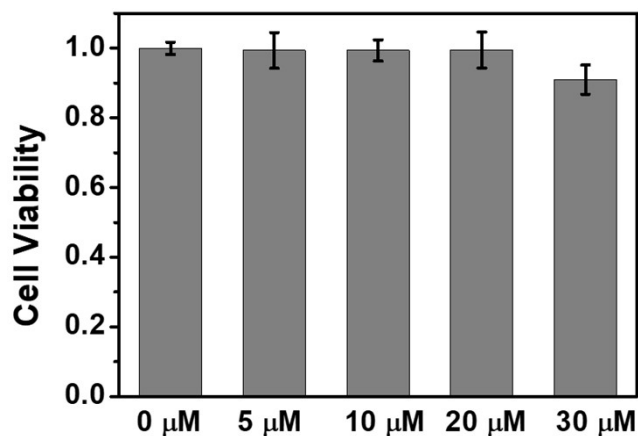

**Figure S6.** Cytotoxicity of AHMC for L02 cells. Cells were incubated with the probe at corresponding concentrations for 24 hours. Cell viability was measured by MTT assay and the results are reported as percentage relative to untreated cells (mean ± SD).

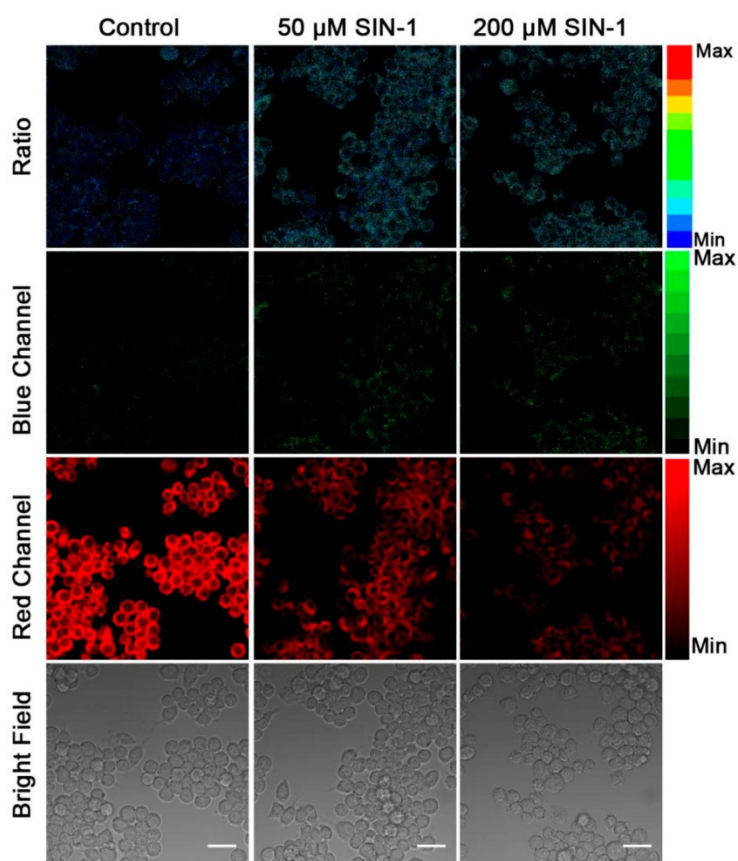

**Figure S7.** Fluorescence images of probe AHMC in RAW264.7 cells under different conditions by confocal fluorescence images. The first column, cells were incubated with AHMC (10 μM, 30 min), then imaged. Cells were prestimulated with SIN-1 (50 μM for the second column or 200 μM for the third column) for 2 h and then with AHMC (10 μM) for 30 min, then imaged. Blue channel: 425–475 nm; red channel: 560–750 nm. Excitation: 405 nm. Ratio images were from blue/red channel. Scale bar = 20 μm.

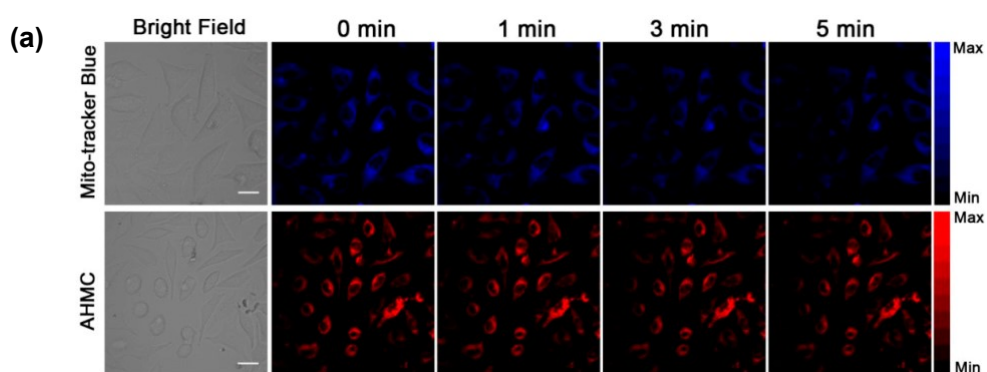

**Figure S8.** (a) Confocal fluorescence images of living L02 cells cultured with **AHMC** (5  $\mu$ M) and **Mito-tracker Blue** (5  $\mu$ M) with continuous irradiation using confocal microscope with the same parameters. (b) Quantification of the relative mean fluorescence levels of cells from the images of **AHMC** ( $\lambda_{\text{ex}} = 405 \text{ nm}$ ,  $\lambda_{\text{em}} = 560\text{-}750 \text{ nm}$ ) and **Mito-tracker Blue** ( $\lambda_{\text{ex}} = 405 \text{ nm}$ ,  $\lambda_{\text{em}} = 425\text{-}475 \text{ nm}$ ). Scale bar = 20  $\mu$ m.



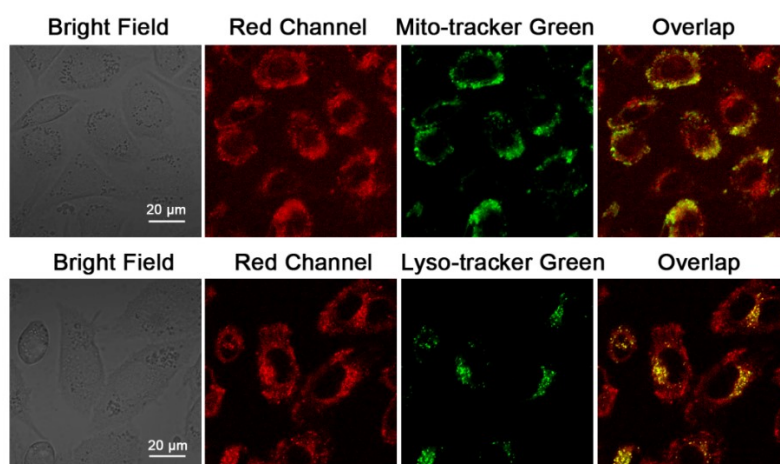

**Figure S9.** Co-localization images of AHMC in L02 cells. Green channel at 500-550 nm for Mito-tracker Green and Lyso-tracker Green ( $\lambda_{ex}$  = 488 nm); red channel at 560-750 nm for probe ( $\lambda_{ex}$  = 405 nm). Overlay: the merged images from green and red channel. Scale bar: 20  $\mu$ m.

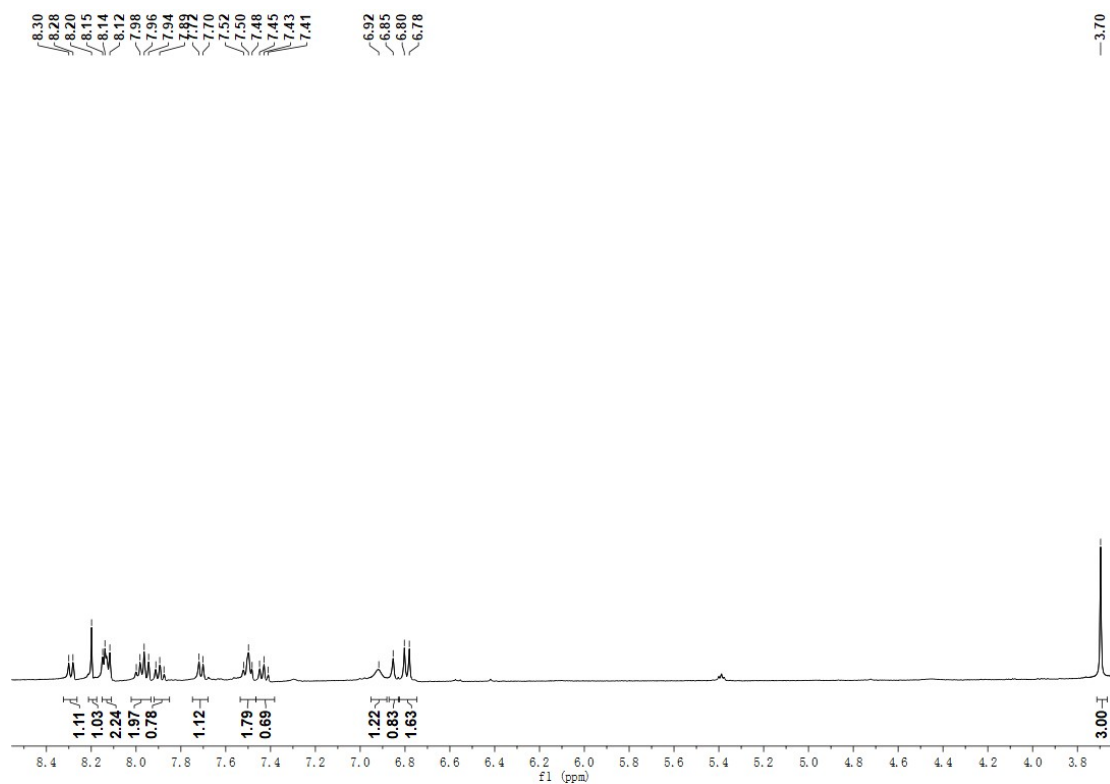

**Figure S10.** The  $^1\text{H}$ NMR spectrum of probe AHMC ( $\text{DMSO-}d_6$ )

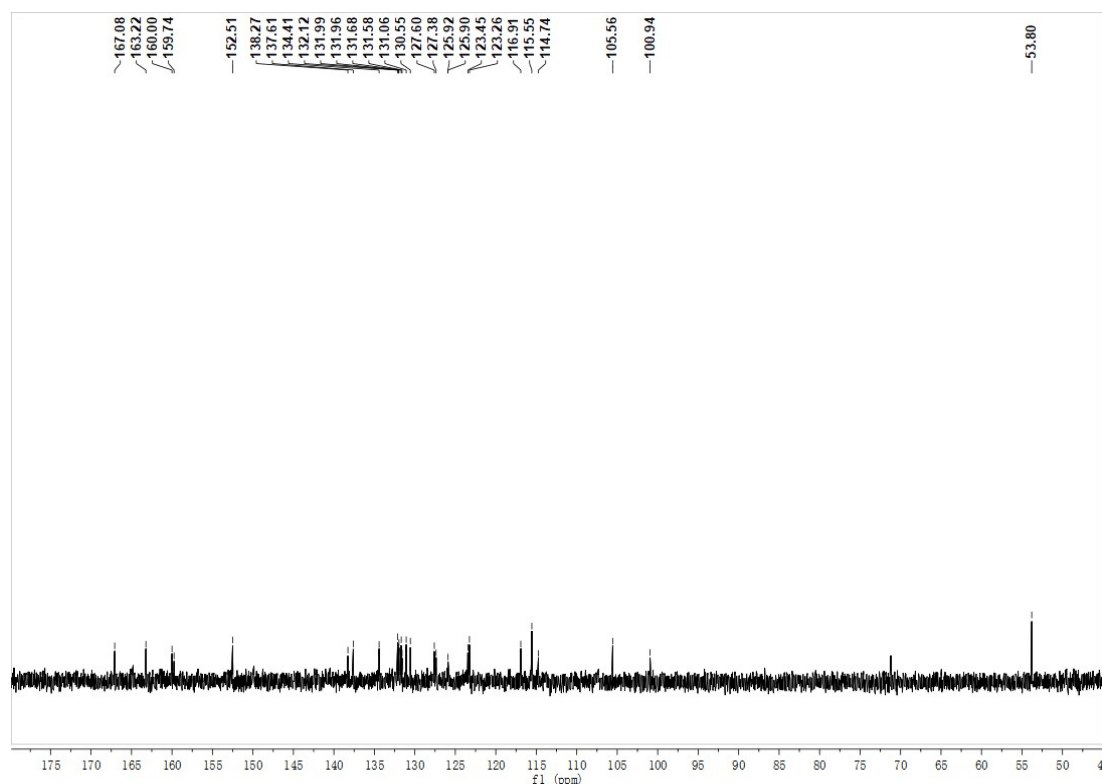

Figure S11. The  $^{13}\text{C}$ NMR spectrum of probe AHMC ( $\text{DMSO-}d_6$ )

## 7. References

- [1] J. Yuan, R. Peng, D. Cheng, L.-H. Zou and L. Yuan, *Chem. Asian J.*, 2021, **16**, 342-347.
- [2] D. Cheng, Y. Pan, L. Wang, Z. Zeng, L. Yuan, X. Zhang and Y. T. Chang, *J. Am. Chem. Soc.*, 2017, **139**, 285-292.
- [3] T. Peng, N. K. Wong, X. Chen, Y. K. Chan, Z. Sun, J. J. Hu, J. Shen, H. El-Nezami and D. Yang, *J. Am. Chem. Soc.*, 2014, **136**, 11728-11734.
- [4] X. Jia, Q. Chen, Y. Yang, Y. Tang, R. Wang, Y. Xu, W. Zhu and X. Qian, *J. Am. Chem. Soc.*, 2016, **138**, 10778-10781.
- [5] Z. Li, S.-H. Yan, C. Chen, Z.-R. Geng, J.-Y. Chang, C.-X. Chen, B.-H. Huang and Z.-L. Wang, *Biosens. Bioelectron.*, 2017, **90**, 75-82.
- [6] D. Cheng, X. Gong, Q. Wu, J. Yuan, Y. Lv, L. Yuan and X. Zhang, *Anal. Chem.*, 2020, **92**, 11396-11404.
- [7] L. Wu, Y. Wang, M. Weber, L. Liu, A. C. Sedgwick, S. D. Bull, C. Huang and T. D. James, *Chem. Commun.*, 2018, **54**, 9953-9956.
